# Supplementary material for: Eurycoma longifolia (Jack) Improves Serum Total Testosterone in Men: A Systematic Review and Meta-Analysis of Clinical Trials
Source: MDPI journal article supplement (doi:10.3390/medicina58081047), 2022-08-04
Supplement: s1 [file s1]

**Supplementary Table S1:** Publication bias across studies included in meta-analysis

| Study Types                                                                                                      | Egger's test |                     |         | Begg's test   |         |
|------------------------------------------------------------------------------------------------------------------|--------------|---------------------|---------|---------------|---------|
|                                                                                                                  | Intercept    | 95% CI              | P value | Kendall's Tau | P value |
| <b>Studies (n=5) evaluating testosterone levels in men supplemented with <i>E. longifolia</i></b>                | 5.1508       | -0.2908 to 10.5925  | 0.0591  | 0.7143        | 0.0243  |
| <b>Studies (n=3) evaluating testosterone levels in normal healthy men supplemented with <i>E. longifolia</i></b> | 8.7118       | -78.0781 to 95.5016 | 0.4233  | 0.3333        | 0.6015  |
| <b>Studies (n=2) evaluating testosterone levels in hypogonadism men supplemented with <i>E. longifolia</i></b>   | 5.8527       | 1.2257 to 10.4796   | 0.0321  | 1.0000        | 0.0415  |
